# Supplementary material
Source: PubMed Central journal article supplement (PMC3133915)
Supplement: supp_138.15.3235_DEV059634TableS1.pdf [file supp_138.15.3235_DEV059634TableS1.pdf]

**Table S1. Quantitative PCR primers**

|              | Forward                   | Reverse                     |
|--------------|---------------------------|-----------------------------|
| <i>cmhc2</i> | ACTTCACTGTCTTCCTCACCTCTT  | AGCAGCCTCTTGAACATCATCTTTATT |
| <i>kdrl</i>  | TGGGACACTCACACTCATTGTC    | TATGACTAGCTTGCTGCAGTGCTT    |
| <i>pu.1</i>  | ACATCGGTGTGTTACCCTCACA    | CTACGACTGCTGGGATCTTCCT      |
| <i>lycat</i> | CGCATCGTGGCCACCTGGCTGACCT | TAGCGCAGTAAGCAGCACCACAGGA   |
| <i>vmhc</i>  | AATGAGTGGGTCACCAAAGG      | CAACCATCAAAGGAACATCT        |
| <i>amhc</i>  | TTGAGGAATCCACCCTTCAG      | TCAATCTGTTCCCCGAGTTC        |
| <i>gapdh</i> | GGTCATTGATGGTCATGCAATC    | CACCTGCATCACCCCACTTA        |
